# Supplementary material for: Characteristics of Disease-Specific and Generic Diagnostic Pitfalls: A Qualitative Study
Source: PubMed Central journal article supplement (PMC8783262; doi:10.1001/jamanetworkopen.2021.44531), 2022-01-21
Supplement: jamanetwopen-e2144531-s001.pdf [file jamanetwopen-e2144531-s001.pdf]

## Supplementary Online Content

Schiff GD, Volodarskaya M, Ruan E, et al. Characteristics of disease-specific and generic diagnostic pitfalls: a qualitative study. *JAMA Netw Open*. 2022;5(1):e2144531. doi:10.1001/jamanetworkopen.2021.44531

**eTable 1.** Diagnosis Error Evaluation and Research (DEER) Taxonomy

**eTable 2.** Reliable Diagnosis Challenges (RDC) Taxonomy

**eTable 3.** Diagnostic Pitfalls Associated With Neurological Conditions

**eTable 4.** Diagnostic Pitfalls Associated With Breast Cancer

**eTable 5.** Generic Diagnostic Pitfalls Associated With Most Frequent Conditions

This supplementary material has been provided by the authors to give readers additional information about their work.

**eTable 1. Diagnosis Error Evaluation and Research (DEER) Taxonomy**

| <i>Where in diagnostic process</i> |   | <i>What went wrong</i>                                    |
|------------------------------------|---|-----------------------------------------------------------|
| 1. Access/Presentation             | A | Failure/delay in presentation                             |
|                                    | B | Failure/denied care access                                |
| 2. History                         | A | Failure/delay in eliciting critical piece of history data |
|                                    | B | Inaccurate/misinterpretation                              |
|                                    | C | Failure in weighing                                       |
|                                    | D | Failure/delay to follow-up                                |
| 3. Physical Exam                   | A | Failure/delay in eliciting critical physical exam finding |
|                                    | B | Inaccurate/misinterpreted                                 |
|                                    | C | Failure in weighing                                       |
|                                    | D | Failure/delay to follow-up                                |
| 4. Tests (Lab/Radiology)           |   | <i>Ordering</i>                                           |
|                                    | A | Failure/delay in ordering needed test(s)                  |
|                                    | B | Failure/delay in performing ordered test(s)               |
|                                    | C | Error in test sequencing                                  |
|                                    | D | Ordering of wrong test(s)                                 |
|                                    | E | Test ordered wrong way                                    |
|                                    |   | <i>Performance</i>                                        |
|                                    | F | Sample mixup/mislabeled (eg, wrong patient/test)          |
|                                    | G | Technical errors/poor processing of specimen/test         |
|                                    | H | Erroneous lab/radiology reading of test                   |
|                                    | I | Failed/delayed reporting of result to clinician           |
|                                    |   | <i>Clinician Processing</i>                               |
|                                    | J | Failed/delayed follow-up of (abnormal) test result        |
|                                    | K | Error in clinician interpretation of test                 |
| 5. Assessment                      |   | <i>Hypothesis Generation</i>                              |
|                                    | A | Failure/delay in considering the diagnosis                |
|                                    |   | <i>Suboptimal Weighing/Prioritization</i>                 |
|                                    | B | Too little consideration/weight given to the diagnosis    |
|                                    | C | Too much weight on competing/coexisting diagnosis         |
|                                    |   | <i>Recognizing Urgency/Complications</i>                  |
|                                    | D | Failure/delay to recognize/weigh urgency                  |
|                                    | E | Failure/delay to recognize/weigh complication(s)          |
| 6. Referral/Consultation           | A | Failure/delay in ordering referral                        |
|                                    | B | Failure/delay obtaining/scheduling ordered referral       |
|                                    | C | Error in diagnostic consultation performance              |
|                                    | D | Failure/delayed communication/follow-up of consultation   |
| 7. Follow-up                       | A | Failure to refer patient to close/safe setting/monitoring |
|                                    | B | Failure/delay in timely follow-up/rechecking of patient   |

**eTable 2.** Reliable Diagnosis Challenges (RDC) Taxonomy

**Challenging disease presentation**

- Atypical presentation
- Non-specific symptoms and signs
- Unfamiliar/outside specialty
- Findings masking/mimicking another diagnosis
- Red herring misleading findings
- Rapidly progressive course
- Slowly evolving blunting onset perception
- Deceptively benign course

**Patient factors**

- Language/communication barriers
- Signal:noise -- patients with multiple other symptoms or diagnoses
- Failure to share data (to be forthcoming with symptoms or their severity)
- Failure to follow-up

**Testing challenges**

- Test not available due geography, access, cost
- Logistical issues in scheduling, performing
- False positive/negative test limitations
- Performance/interpretation failures
- Equivocal results/interpretation
- Test follow-up issues (e.g., tracking pending results)

**Stressors**

- Time constraints for clinicians and patients
- Discontinuities of care
- Fragmentation of care
- Memory reliance/challenges

**Broader challenges**

- Recognition of acuity/severity
- Diagnosis of complications
- Recognition of failure to respond to therapy
- Diagnosis of underlying etiologic cause
- Recognizing misdiagnosis occurrence

**eTable 3.** Diagnostic Pitfalls Associated With Neurological Conditions

| Correct Diagnosis                               | Incorrect/Initial Dx               | Pitfall; Comments                                                                                                                                     |
|-------------------------------------------------|------------------------------------|-------------------------------------------------------------------------------------------------------------------------------------------------------|
| <b>Significant, Missed Neurologic Diagnoses</b> |                                    |                                                                                                                                                       |
| cerebellar hemorrhage, infarct                  | Viral GI illness                   | Cerebellar infarct missed because nausea and vomiting (even without constipation and/or diarrhea) was dismissed as viral GI illness.                  |
|                                                 | Other headache                     | Pt with headache, nausea, vomiting and missed cerebellar stroke until patient becomes somnolent                                                       |
| CVA                                             | vertigo, labyrinthitis             | not recognizing stroke symptoms, diagnosing as vertigo or labyrinthitis                                                                               |
|                                                 | peripheral dizziness               | dizziness thought to be peripheral but actually stroke                                                                                                |
|                                                 | peripheral nervous system diseases | foot drop, wrist drop for peripheral -- stroke                                                                                                        |
|                                                 | diabetic neuropathy                | acute onset limb weakness referred for diabetic neuropathy, diagnosis = stroke                                                                        |
| vertebrobasilar disease, TIA, stroke            | benign vestibulopathy              | dizzy, vestibulopathy when it is vertebrobasilar disease, TIA/stroke                                                                                  |
| Subdural hematoma                               | benign headache                    | headache thought to be benign but was a subdural hematoma                                                                                             |
| Brain Tumor                                     | Migraine                           | missing severe headache etiologies and labeling migraines (tumor and temporal arteritis)                                                              |
|                                                 | trigeminal neuralgia               | confusion with unilateral jaw/face pain confused with trigeminal neuralgia but ultimately malignancy                                                  |
| RCSV, SAH, pseudotumor                          | benign headache                    | headache with organic pathology (RCSV, SAH, pseudotumor) treated with fioricet and patient has to present multiple times before imaging               |
| paraneoplastic syndrome                         | primary psychiatric disease        | new onset psychosis attributed to primary psychiatric disease in someone with features of paraneoplastic syndrome                                     |
| pseudotumor cerebri                             | migraine                           | pseudotumor cerebri diagnosed as migraine                                                                                                             |
| Encephalitis                                    | schizophrenia                      | psychotic break that was assumed to be schizophrenia but was encephalitis                                                                             |
| fungal infection                                | migraine                           |                                                                                                                                                       |
| amyotrophic lateral sclerosis                   | weakness                           | weak limb -> [illegible] without pain -> ALS                                                                                                          |
|                                                 | Alzheimer's                        | dysphagia leading to Alzheimer's work-up when it is ALS                                                                                               |
| cervical spine lesion                           |                                    | not considering cervical spine lesion as potential cause for leg weakness/gait problem. ordering L-spine MRI and stopping or not ordering c-spine MRI |
| cervical spondylosis                            | missed/overdiagnosed               | cervical spondylosis both missed and overdiagnosed (imbalance, hand numbness)                                                                         |
| spinal fracture with cord compression           | Guillain-Barre syndrome            | lower extremity weakness misdiagnosed as Guillain-Barre but was spinal fracture with cord compression                                                 |
| Temporal Arteritis                              | Migraine                           | missing severe headache etiologies and labeling migraines (tumor and temporal arteritis)                                                              |
| Guillain-Barre Syndrome                         | benign paresthesia                 | Guillain-Barre syndrome subtle tingling dismissed and pt represents when more obvious weakness manifests                                              |
| autoimmune necrotizing myopathy                 | toxic myopathy                     | Rare patients on statins develop pan autoimmune necrotizing myopathy, not typical toxic myopathy.                                                     |

|                                                                                         |                                                   |                                                                                                                                                                                                         |
|-----------------------------------------------------------------------------------------|---------------------------------------------------|---------------------------------------------------------------------------------------------------------------------------------------------------------------------------------------------------------|
|                                                                                         |                                                   | Patients do not get better with discontinuation of statins but only after treating with immunotherapy                                                                                                   |
| Multiple sclerosis                                                                      |                                                   | early signs of multiple sclerosis such as optic neuritis not recognized                                                                                                                                 |
| optic neuritis                                                                          | decreased vision                                  | misdiagnosing optic neuritis for decreased vision                                                                                                                                                       |
| parkinsonism                                                                            | chronic fatigue syndrome                          | misdiagnosis                                                                                                                                                                                            |
| Parkinson's Disease                                                                     |                                                   | not recognizing parkinsonism, thinking it is weakness, fatigue, tiredness, etc.                                                                                                                         |
| Parkinson's Disease                                                                     | tremor 2/2 shoulder surgery                       | tremor related to shoulder surgery, diagnosis = Parkinson's disease                                                                                                                                     |
| medication induced Parkinson's                                                          |                                                   | missing medication induced Parkinson's                                                                                                                                                                  |
| ulnar neuropathy                                                                        |                                                   | not recognizing common entrapment syndromes and doing unnecessary tests/referrals (e.g., ulnar neuropathy)                                                                                              |
| thoracodorsal radiculopathy                                                             | surgical cause abdominal pain                     | abdominal pain in DM - abdominal w/u [surgery?]                                                                                                                                                         |
| B12 deficiency                                                                          |                                                   | not checking methylmalonic acid in low normal b12 levels in patients with symptoms                                                                                                                      |
| Medication Overuse Headache                                                             | Headache                                          | headache/pain management with medication overuse causing overmedication headaches or causing somnolence with overmedication                                                                             |
| <b>Misdiagnoses/Overdiagnosis of other diagnoses as more serious Neurologic Disease</b> |                                                   |                                                                                                                                                                                                         |
| Overdiagnosis CIPD                                                                      | chronic inflammatory demyelinating polyneuropathy | not warming up limbs before nerve conduction study and mislabeling as CIPD and treating with IUG                                                                                                        |
| Bell's palsy                                                                            | stroke                                            | mistaking lower motor neuron facial weakness (Bell's Palsy) thinking it is a stroke                                                                                                                     |
| No Seizure disorder                                                                     | Seizure Disorder                                  | overtreating seizures                                                                                                                                                                                   |
| Non MS                                                                                  | MS                                                | diagnosis of MS based only MRI, non-specific lesion                                                                                                                                                     |
|                                                                                         |                                                   | MRIs for non-specific systemic symptoms leads to incident [illegible] MRI findings                                                                                                                      |
| vasovagal syncope                                                                       | seizure, stroke                                   | syncopal events (often vasovagal) referred for extensive work-up for seizure, stroke, etc. "answer" often in better history taking                                                                      |
| No TIA; nonspecific sx                                                                  | TIA                                               | making excessive TIA diagnosis                                                                                                                                                                          |
| Anemia or Cardiac Arrhythmia                                                            | TIA                                               | not looking at CBC and EKG in TIA patients                                                                                                                                                              |
| mouth infection?                                                                        | giant cell arteritis                              | confusion with unilateral jaw/face pain presumed to be giant arteritis, treated with steroids which lead to worsening mouth infection and infective endocarditis                                        |
| Other neuro non CVA dx                                                                  | ischemia                                          | assumption all subacute/acute changes in neurologic function are ischemic in etiology                                                                                                                   |
| Nonspecific dx                                                                          | Neuro Lyme                                        | labelling chronic symptoms as neuro lyme                                                                                                                                                                |
| functional disorder, conversion disorder                                                | peripheral nervous system diseases                | misdiagnosis of peripheral nervous system disease in functional or conversion disorder                                                                                                                  |
|                                                                                         | organic disease                                   | misdiagnosis of functional neurological symptom disorder as an organic disease and performing excessive diagnostic tests and initiating potentially harmful treatments (ex: AED [?anti-epileptic drug]) |

|                                                       |                                         |                                                                                                                                                                                                                                                                                                                                                                                                                                                                         |
|-------------------------------------------------------|-----------------------------------------|-------------------------------------------------------------------------------------------------------------------------------------------------------------------------------------------------------------------------------------------------------------------------------------------------------------------------------------------------------------------------------------------------------------------------------------------------------------------------|
| psychiatric symptoms with somatization manifestations | Neurologic condition                    | referral for psychiatric symptoms with somatic manifestations and no clear clinical symptoms/signs of neurologic disease                                                                                                                                                                                                                                                                                                                                                |
| neurologic illness                                    | psych illness                           | new psychiatric symptoms attributed to psych illness rather than a missed neurologic illness (brain tumor, stroke, encephalitis)                                                                                                                                                                                                                                                                                                                                        |
| psychogenic non-epileptic seizures                    | epilepsy                                | psychogenic non-epileptic seizures misdiagnosed as epilepsy, on meds for months/years                                                                                                                                                                                                                                                                                                                                                                                   |
| hysterics with non-organic findings                   | neuro disease                           | Diagnosing hysterics with outrageously non-organic findings as having neurological disease. Possibly not wishing to address the issue                                                                                                                                                                                                                                                                                                                                   |
| orthostasis, anxiety                                  | More serious neuro dx causing dizziness | referral for dizziness in patient with orthostasis, anxiety, or other non-neurological etiology                                                                                                                                                                                                                                                                                                                                                                         |
| Non neuro benign causes syncope dizziness             | Syncope/dizziness due to neuro etiology | syncope/dizziness is usually attributed to neurologic causes other than obvious reasons                                                                                                                                                                                                                                                                                                                                                                                 |
| No PMR                                                | PMR                                     | Response to steroid mistaken for diagnostic support for PMR.                                                                                                                                                                                                                                                                                                                                                                                                            |
| No MS / asymptomatic                                  | MS (abnormalities of MRI)               | MRIs performed for unclear diagnostic reasons, some findings, and then asymptomatic patient referred to exclude MS                                                                                                                                                                                                                                                                                                                                                      |
| Other (potentially more serious) neuro dx             | transient global amnesia                | over-diagnosed                                                                                                                                                                                                                                                                                                                                                                                                                                                          |
| TMJ                                                   |                                         | confusion with unilateral jaw/face pain leading to referral when actually just TMJ                                                                                                                                                                                                                                                                                                                                                                                      |
| muscle disease                                        | liver disease                           | I see many patients with muscle diseases who initially are misdiagnosed as having a liver disease because routine AST and ALT levels are elevated. Many clinicians forget that these should not be referred as "liver function tests." These enzymes are also present in muscle. I see several patients every year who get abdominal CT/US and even liver biopsies before someone checks a serum CK. This should be done before a dangerous and expensive liver work-up |
| <b>Generic/Other Neurology Diagnosis Pitfalls</b>     |                                         |                                                                                                                                                                                                                                                                                                                                                                                                                                                                         |
| neuro conditions                                      | psych illness                           | not considering new overt psych symptoms as potentially neurological                                                                                                                                                                                                                                                                                                                                                                                                    |
| Non NPH causes of dementia                            | NPH                                     | overdiagnosis of NPH                                                                                                                                                                                                                                                                                                                                                                                                                                                    |
| dementia                                              | NPH                                     | misdiagnosis of Normal Pressure Hydrocephalus in cases of dementia                                                                                                                                                                                                                                                                                                                                                                                                      |
| dementia                                              |                                         | referrals for dementia evals not early enough                                                                                                                                                                                                                                                                                                                                                                                                                           |
| metabolic disease                                     |                                         | congenital states can be misinterpreted as focal abnormalities and potentially not diagnosed for toxic/metabolic abnormalities                                                                                                                                                                                                                                                                                                                                          |
| febrile seizures                                      |                                         | unnecessary referrals for simple febrile seizures                                                                                                                                                                                                                                                                                                                                                                                                                       |
| ataxia                                                | weakness                                | confusing ataxia with weakness                                                                                                                                                                                                                                                                                                                                                                                                                                          |
| mild cognitive difficulties                           |                                         | missing mild cognitive difficulties which manifest as multiple organic complaints                                                                                                                                                                                                                                                                                                                                                                                       |
| bulbar weakness                                       | appetite problem                        | mistaking poor PO intake for appetite problem instead of bulbar weakness                                                                                                                                                                                                                                                                                                                                                                                                |
| Serious HA                                            | benign headache                         | filtering headache syndromes. In the ED we would commonly see patients whose concerning HA was initially minimized. On the other hand, would see non-concerning HA triaged to the ED.                                                                                                                                                                                                                                                                                   |

|                                          |                                    |                                                                                                                                                                                                          |
|------------------------------------------|------------------------------------|----------------------------------------------------------------------------------------------------------------------------------------------------------------------------------------------------------|
| benign headache                          | Serious HA                         | benign headache                                                                                                                                                                                          |
| Benign Headache                          |                                    | MRI of the brain is overperformed, particularly in cases of mild headache and lead to a work-up of incidentally found tumors particularly meningiomas                                                    |
| Benign; unrelated, incidentaloma         | Meningioma                         | attributing symptoms to meningioma that is actually asymptomatic                                                                                                                                         |
| peripheral neuropathy                    |                                    | numb feet in old people - peripheral neuropathy                                                                                                                                                          |
| afferent papillary light defect          |                                    | pt with optic nerve dysfunction, but diagnosis is missed because eyes get dilated before dx can be made during eye exam                                                                                  |
| Physiological Anisocoria                 | Anisocoria due to neurologic issue | anisocoria that is physiological                                                                                                                                                                         |
| Neuro etiologies visual impairment       | Ophthalmology visual impairment    | vision complaints mis-triaged to ophthalmology                                                                                                                                                           |
| CNS vertigo                              | Peripheral Vertigo                 | dizziness approach, usually can't make a correct differential diagnosis between CNS vertigo or peripheral vertigo                                                                                        |
| Non-specified Neuro "decline"            |                                    | missing course of illness/history because patients are not forthcoming about their decline                                                                                                               |
| Autism                                   |                                    | delayed referrals for language delay w/u or autism w/u                                                                                                                                                   |
| neurodegenerative disorder               | missed dx                          | missing diagnosis of neurodegenerative disorder, thereby not giving treatment that can improve patient quality of life                                                                                   |
| Increasing head circumference in infants |                                    | delayed referrals for head ultrasounds for rapidly increasing head circumference in infants                                                                                                              |
|                                          |                                    | ordering unnecessary tests (esp. MRI) for psychosomatic complaints                                                                                                                                       |
|                                          |                                    | MRI obtained without clear indication (e.g., dizzy, headache without feature) leading to nonspecific findings, leading to referral and sometimes requiring testing that would otherwise not be necessary |

*Data source:* Derived from 836 relevant cases among 4,325 patient safety incident reports, 403 closed malpractice claims, and 24 M&M reports, and 355 focus groups responses.

**eTable 4. Diagnostic Pitfalls Associated With Breast Cancer**

| <b>Disease-specific diagnostic pitfall</b>           | <b>No.</b> | <b>Example of cases demonstrating pitfall</b>                                                                                                                                                                                                                                                                                                                                                                 |
|------------------------------------------------------|------------|---------------------------------------------------------------------------------------------------------------------------------------------------------------------------------------------------------------------------------------------------------------------------------------------------------------------------------------------------------------------------------------------------------------|
| 1. Family History Issues                             | 4          | <ul style="list-style-type: none"> <li>• Failure to obtain family history of breast cancer</li> <li>• Under-weighting family history of breast cancer</li> </ul>                                                                                                                                                                                                                                              |
| 2. Atypical Presentation/ Cognitive Challenges       | 6          | <ul style="list-style-type: none"> <li>• Underestimating risk of BC in young symptomatic patients</li> <li>• Fast-growing cancers arising during MMG interval</li> <li>• Under-weighting complaints of patients with psychiatric diagnoses</li> <li>• Prioritizing chronic medical or social issues over screenings in complex patients</li> </ul>                                                            |
| 3. False Negative Physical Exam                      | 2          | <ul style="list-style-type: none"> <li>• Lump felt to be benign on physical exam</li> <li>• Bias in wanting to reassure patient, due to low likelihood of BC</li> </ul>                                                                                                                                                                                                                                       |
| 4. Fibrocystic/Dense Breast Dilemmas                 | 9          | <ul style="list-style-type: none"> <li>• Fibrocystic breast tissue can obscure underlying BC in MMG</li> <li>• Not recognizing changes in breast density over time</li> <li>• Failure to investigate unilateral fibrocystic changes</li> <li>• Failure to investigate breast lump with FNA in patient with dense breasts and negative U/S</li> </ul>                                                          |
| 5. Screening vs. Diagnostic Mammogram Order          | 2          | <ul style="list-style-type: none"> <li>• Ordering/performing a screening MMG, rather than a diagnostic MMG</li> </ul>                                                                                                                                                                                                                                                                                         |
| 6. False Negative Mammogram                          | 9          | <ul style="list-style-type: none"> <li>• False negative MMG in pt with fibrocystic breasts</li> <li>• Failure to reevaluate breast complaints in light of previously negative MMG</li> <li>• Misreading of MMG by radiologists</li> <li>• Failure to follow-up on nipple retraction observed on MMG, attributing it to imaging technique</li> <li>• Falsely reassuring negative “additional views”</li> </ul> |
| 7. False Negative Ultrasound                         | 2          | <ul style="list-style-type: none"> <li>• Falsely reassuring negative U/S in pts with breast lump</li> </ul>                                                                                                                                                                                                                                                                                                   |
| 8. Surgical Referral                                 | 4          | <ul style="list-style-type: none"> <li>• Failure to refer to breast surgeon</li> <li>• Breast lump appearing benign to surgeon palpation</li> <li>• Patient failure to follow-up on referral</li> </ul>                                                                                                                                                                                                       |
| 9. Biopsy Performance/ Interpretation                | 1          | <ul style="list-style-type: none"> <li>• Inability to recognize missed sampling due to bleeding/complications and failure to repeat biopsy</li> </ul>                                                                                                                                                                                                                                                         |
| 10. Failure to Order Further Studies                 | 2          | <ul style="list-style-type: none"> <li>• Failure to order diagnostic imaging studies (MMG and U/S)</li> <li>• Failure to recommend excisional biopsy</li> </ul>                                                                                                                                                                                                                                               |
| 11. Diffusion of Responsibility/ Coordination Issues | 4          | <ul style="list-style-type: none"> <li>• Failure to document/ensure pt was receiving screening MMGS and breast exams</li> <li>• Failed coordination/communication between PCP and GYN</li> </ul>                                                                                                                                                                                                              |
| 12. Other Symptoms                                   | 8          | <ul style="list-style-type: none"> <li>• Failure to follow-up on resolution of mastitis</li> <li>• Failure to pursue etiology of persistent galactorrhea</li> <li>• Pursuing lymphoma as cause of lymphadenopathy</li> <li>• Axillar lymphadenopathy lost due to fact that not incorporated into BIRADS coding (revised now)</li> <li>• Failure to work up persistent painful cyst</li> </ul>                 |

*Data source:* Derived from 836 relevant cases among 4,325 patient safety incident reports, 403 closed malpractice claims, and 24 M&M reports, and 355 focus groups responses.



**eTable 5.** Generic Diagnostic Pitfalls Associated With Most Frequent Conditions

| Diagnostic Pitfalls                                                  | Overall (N=241) | Colon cancer (N=46) | Lung cancer (N=43) | Prostate cancer (N=34) | Breast cancer (N=33) | Myocardial infarction (N=29) | Sepsis (N=16) | Stroke (N=16) | Pulmonary Embolism (N=11) | Thyroid cancer (N=7) | Melanoma (N=6) |
|----------------------------------------------------------------------|-----------------|---------------------|--------------------|------------------------|----------------------|------------------------------|---------------|---------------|---------------------------|----------------------|----------------|
|                                                                      | No. (%)         |                     |                    |                        |                      |                              |               |               |                           |                      |                |
| Failure to follow-up                                                 | 68 (28)         | 10 (22)             | 14 (33)            | 16 (47)                | 14 (42)              | 6 (21)                       | -             | -             | -                         | 4 (57)               | 4 (67)         |
| Limitations of a test or exam finding not appreciated                | 62 (26)         | 5 (11)              | 12 (28)            | 8 (24)                 | 14 (42)              | 12 (41)                      | -             | 4 (25)        | 2 (18)                    | 3 (43)               | 2 (33)         |
| Disease A repeatedly mistaken for Disease B                          | 58 (24)         | 9 (20)              | 11 (26)            | 5 (15)                 | -                    | 12 (41)                      | 6 (38)        | 8 (50)        | 3 (27)                    | -                    | 4 (67)         |
| Risk factors not adequately appreciated                              | 39 (16)         | 10 (22)             | -                  | 15 (44)                | 4 (12)               | 7 (24)                       | -             | -             | 3 (27)                    | -                    | -              |
| Atypical presentation                                                | 37 (15)         | -                   | -                  | 4 (12)                 | 15 (45)              | 8 (28)                       | 3 (19)        | 7 (44)        | -                         | -                    | -              |
| Counter-diagnosis cues overlooked (e.g., red flags)                  | 25 (10)         | 21 (46)             | -                  | -                      | -                    | -                            | 4 (25)        | -             | -                         | -                    | -              |
| Communication failures between primary care physician and specialist | 18 (7)          | 7 (15)              | 4 (9)              | -                      | 4 (12)               | 3 (10)                       | -             | -             | -                         | -                    | -              |
| Issues surrounding referral                                          | 7 (3)           | -                   | -                  | 3 (9)                  | -                    | 4 (14)                       | -             | -             | -                         | -                    | -              |
| Urgency not fully appreciated                                        | 6 (2)           | -                   | -                  | -                      | -                    | -                            | 4 (25)        | 2 (13)        | -                         | -                    | -              |
| Chronic disease presumed to account for new symptoms                 | 4 (2)           | -                   | -                  | -                      | -                    | -                            | 3 (19)        | 1 (6)         | -                         | -                    | -              |
| Miscommunication related to lab ordering                             | 3 (1)           | -                   | -                  | -                      | -                    | -                            | 3 (19)        | -             | -                         | -                    | -              |
| Evolving symptoms not monitored                                      | 2 (1)           | -                   | 2 (5)              | -                      | -                    | -                            | -             | -             | -                         | -                    | -              |

*Data source:* Derived from 836 relevant cases among 4,325 patient safety incident reports, 403 closed malpractice claims, and 24 M&M reports, and 355 focus groups responses.
